# Supplementary material
Source: PubMed Central journal article supplement (PMC8284924)
Supplement: NIHMS1723064-supplement-supplementary_materials.pdf [file NIHMS1723064-supplement-supplementary_materials.pdf]

## **Supplemental Information**

### **Shutoff of host transcription triggers a toxin-antitoxin system to cleave phage RNA and abort infection**

**Chantal K. Guegler and Michael T. Laub**

A

## ToxN sequences

*E. coli* MKFYTISSSYIKY LKDFDDKVPNS EDPTYNPKAFIGIVLEIEGHKYLAPLTSP 54  
*P. atrosepticum* MKFYTISSSKYIEYLKEFDDKVPNS EDTYQNPKAFIGIVLEIQGHKYLAPLTSP 54

*E. coli* KAWHANVKESSPAFFKLHENGVPDNQLGLINLKFMIP IIEAEVSLDLDSMPDT 108  
*P. atrosepticum* KKWNNVKESSLSLSCFKLHENGVPENQLGLINLKFMIP IIEAEVSLDLGNMPNT 108

*E. coli* PYKRMLYKQLQFIRVNEDKISEKSKL LRNLALQGRMQGTCDFAVLEEKYQHFGK 162  
*P. atrosepticum* PYKRMLYKQLQFIRANSDKIASKSDTLRNLVLQGKMQGT CNFSLLEEKYRDFGK 162

*E. coli* KPEDMEIDD 171  
*P. atrosepticum* EAEDTEEGE 171

B

## toxI sequences

*E. coli* AAGGTGATTTGCTACCTTTAAGTGCAGCTAGAAATTTAGGTGATTTGCTACCTT 54  
*P. atrosepticum* AAGGTGATTTGCTACCTTTAAGTGCAGCTAGAAATTTAGGTGATTTGCTACCTT 54

*E. coli* TAAGTGCAGCTAGAAATTTAGGTGATTTGCTACCTTTAAGTGCAGCTAGAAATTT 108  
*P. atrosepticum* TAAGTGCAGCTAGAAATTCAGGTGATTTGCTACCTTTAAGTGCAGCTAGAAATTT 108

*E. coli* CAGGTGATTTGCTACCTTTAAGTGCAGCTAGAAATTCAGGTGATTTGCTACCTT 162  
*P. atrosepticum* CAGGTGATTTGCTACCTTTAAGTGCAGCTAGAAATTCAGGTGATTTGCTACCTT 162

*E. coli* TAAGTGCAGCTAGAAATTTAGGTGATTTACTACCTTAAAGTAATAAAGT 211  
*P. atrosepticum* TAAGTGCAGCTAGAAATTCAGGTGATTTACTACCTTAAAGTAATAAAGT 211

C

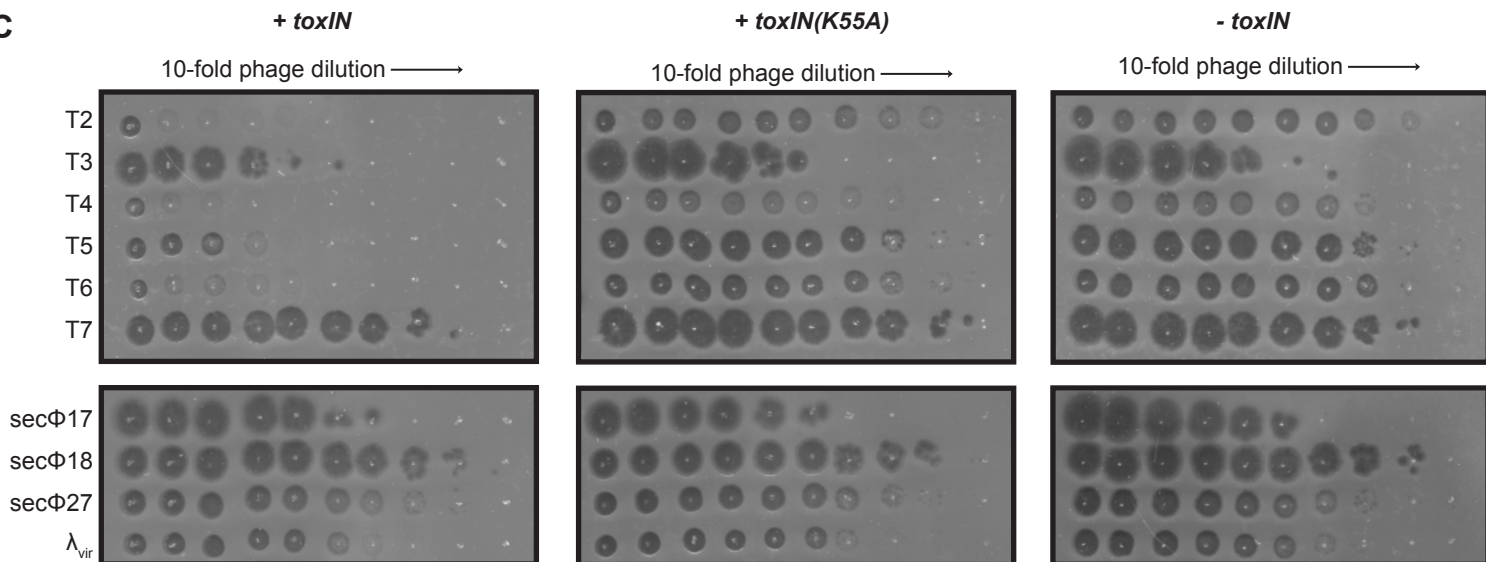

**Fig. S1. *E. coli* *toxIN* is a type III toxin-antitoxin system that protects against multiple coliphage, Related to Fig. 1.**

(A) Sequence alignment of *E. coli* and *P. atrosepticum* ToxN.

(B) Sequence alignment of *E. coli* and *P. atrosepticum* *toxI* arrays, with ToxN cleavage motifs highlighted.

(C) Representative serial dilution plaque assays a panel of coliphage spotted on +*toxIN*, +*toxI* *toxN*(K55A), and –*toxIN* cells.

Figure S2

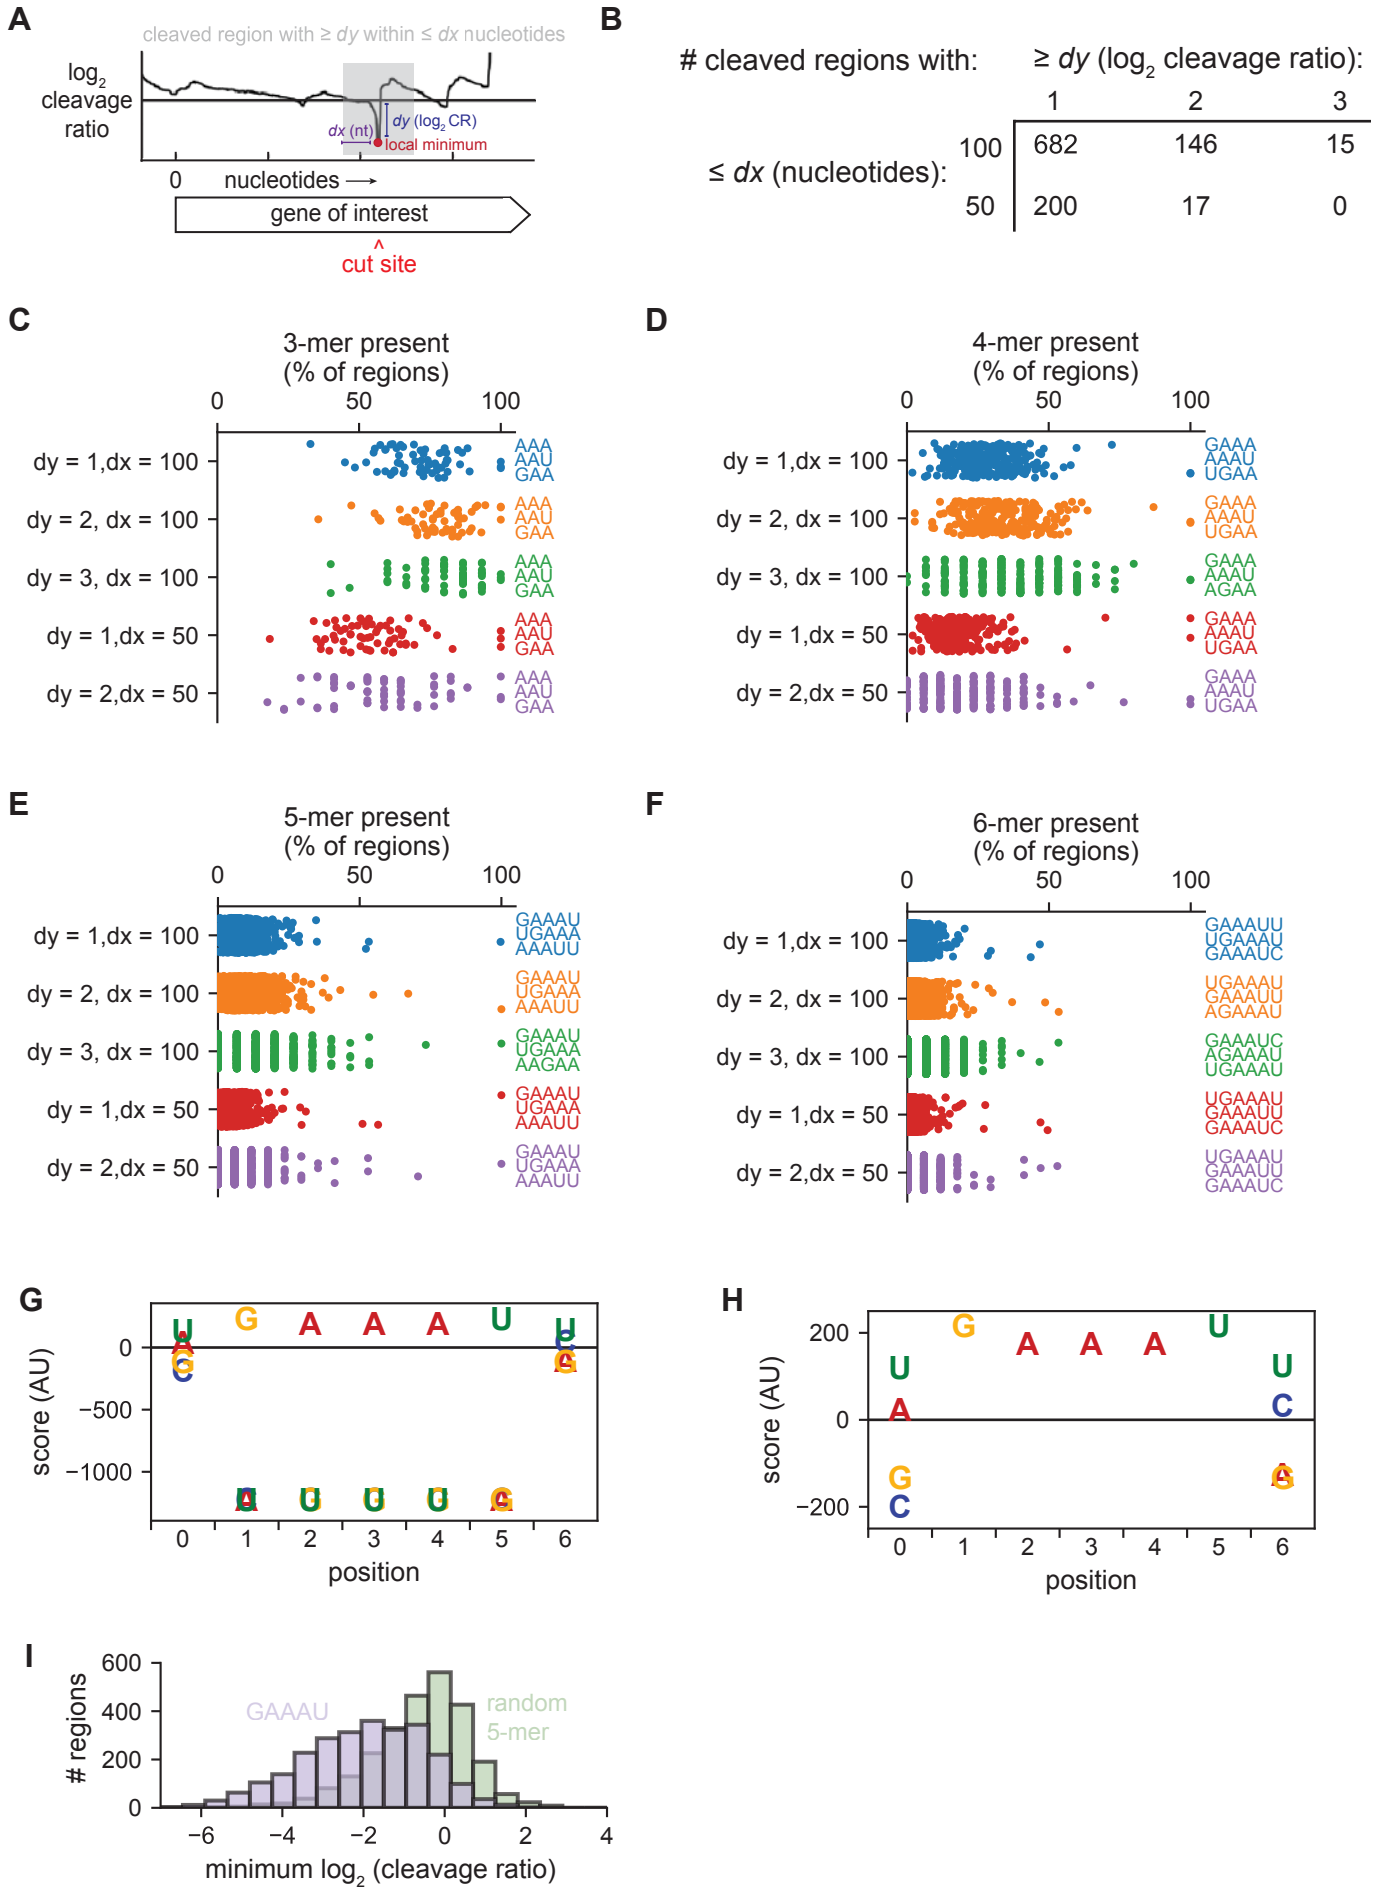

**Fig. S2. ToxN recognizes the 5-mer GAAAU, Related to Fig. 2.**

(A) Schematic overview of computational approach for identifying ToxN cleavage sites. Briefly, we identified local minima in the cleavage ratio array and looked for ‘cleavage valleys’ in which the cleavage ratio increased by a given  $dy$  within a nucleotide distance  $dx$  from the local minimum. We then extracted the sequences of these so-called cleaved regions for further analysis.

(B) Number of cleavage valleys identified using the  $dx$  and  $dy$  thresholds indicated.

(C-F) Scatterplots showing the percent of cleaved regions identified with the thresholds indicated that contain each possible 3-mer (C), 4-mer (D), 5-mer (E), or 6-mer (F). Top three most frequent  $k$ -mers are indicated on the right.

(G) Position weight matrix for sites associated with ToxN-cleaved regions of a maximum width of 100 nt. Scores were calculated using MEME.

(H) Zoomed-in position weight matrix shown in (G).

(I) Histograms showing the distribution of the minimum cleavage ratios within well-expressed GAAAU sequences in *E. coli* transcripts (purple,  $n = 2579$ ) compared to the minimum cleavage ratios within the same number of random 5-mers in the transcriptome (green).

Figure S3

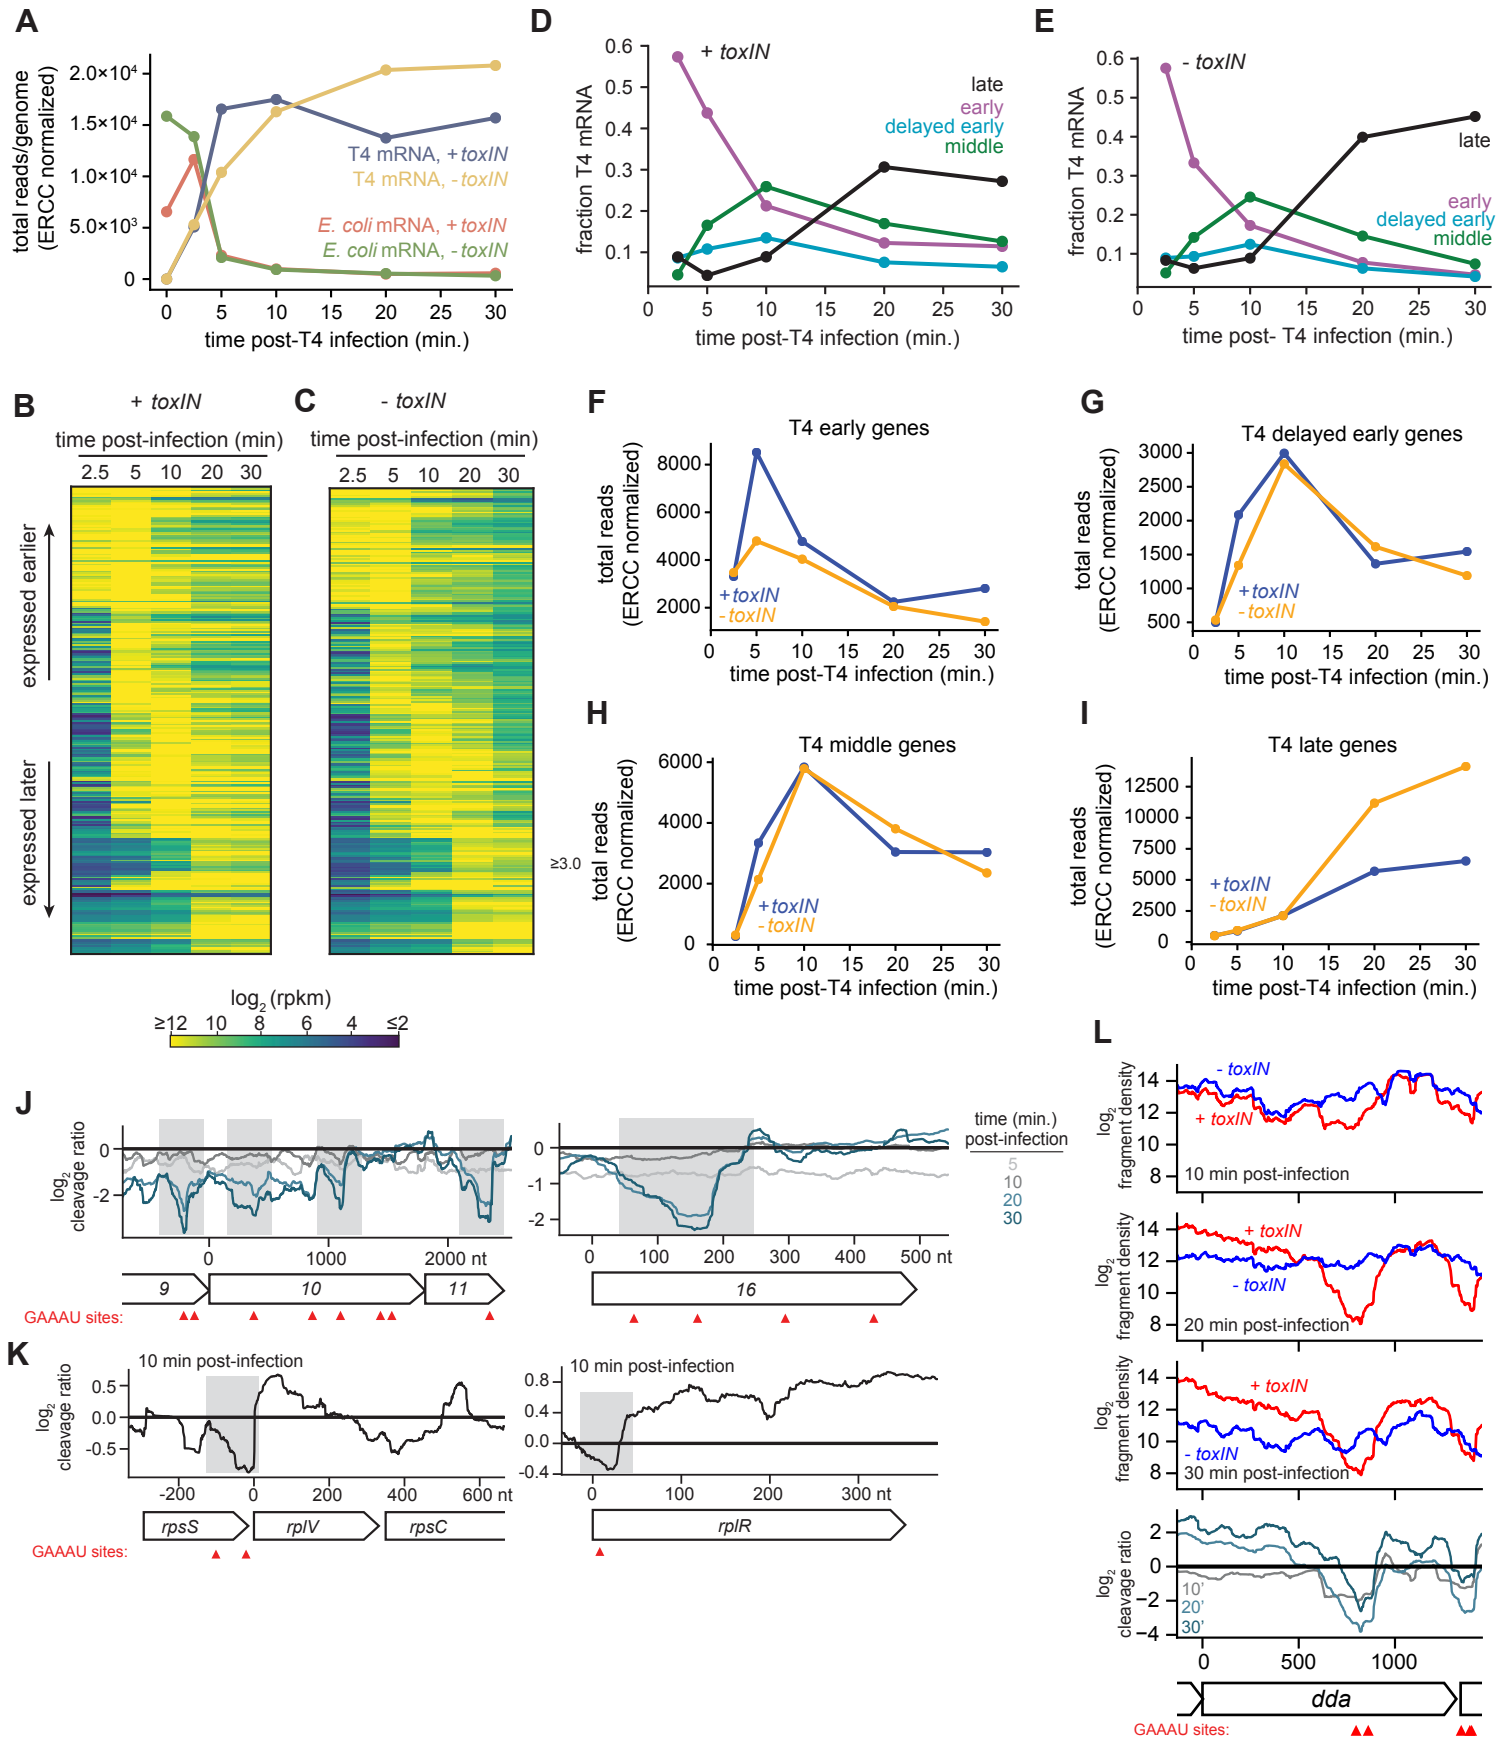

**Fig. S3. ToxN disrupts progression of the T4 life cycle and cleaves phage and host transcripts, Related to Fig. 3.**

(A) Plot showing the total RNA-seq signal coming from host (*E. coli*) and phage (T4) mRNAs relative to the total counts coming from a spike-in control (ERCC standard) at the indicated times post-infection. Note that we included the spike-in control in only one of the two RNA-seq replicates during T4 infection.

(B-C) Heatmaps showing the  $\log_2(\text{rpkm})$  (reads per kilobase per million) for each T4 transcript at each time post-infection in *+toxIN* (B) or *-toxIN* (C) cells. Each row corresponds to an individual gene, and genes are ordered based on their time of peak expression in the *-toxIN* dataset. Time of peak expression was determined by comparing the rpkm for a particular transcript relative to the entire T4 transcriptome and determining the timepoint at which a given gene made up the largest fraction of the T4 transcriptome.

(D-E) Plots showing the fraction of total T4 mRNA signal in RNA-seq coming from different classes of T4 transcripts (early, delayed early, middle, and late) in *+toxIN* (D) or *-toxIN* (E) cells at the indicated times post-infection.

(F-I) Plots showing the total counts coming from T4 early (A), delayed early (B), middle (C), or late (D) mRNAs relative to the total counts coming from a spike-in control (ERCC standard) at the indicated times post-infection in *+toxIN* and *-toxIN* cells. Note that we included the spike-in control in only one of our RNA-seq replicates during T4 infection.

(J) Cleavage profiles for the regions surrounding T4 genes *10* and *16* at 5, 10, 20, and 30 min post-infection. Sites of GAAAU motifs are indicated with red triangles.

(K) Cleavage profiles for the regions surrounding the *E. coli* ribosomal protein genes *rplV* and *rplR* at 10 min post-infection. Sites of GAAAU motifs are indicated with red triangles. See Fig. 2D for the cleavage profile of these regions following ToxN overexpression.

(L) RNA fragment density profiles for *+toxIN* and *-toxIN* cells (top three panels) and cleavage profiles (bottom panel) for the T4 gene *dda* at 10, 20, and 30 min post-infection. As infection proceeds, GAAAU sites are cleaved in the *+toxIN* sample, but the surrounding regions remain stable relative to the *-toxIN* sample, likely due to defects in progression of the T4 life cycle. Thus,

at 20 and 30 min post-infection, the cleavage ratio becomes positive ( $>0$ ) in regions of *dda* surrounding the cut site. Also see Fig. 3C.

Figure S4

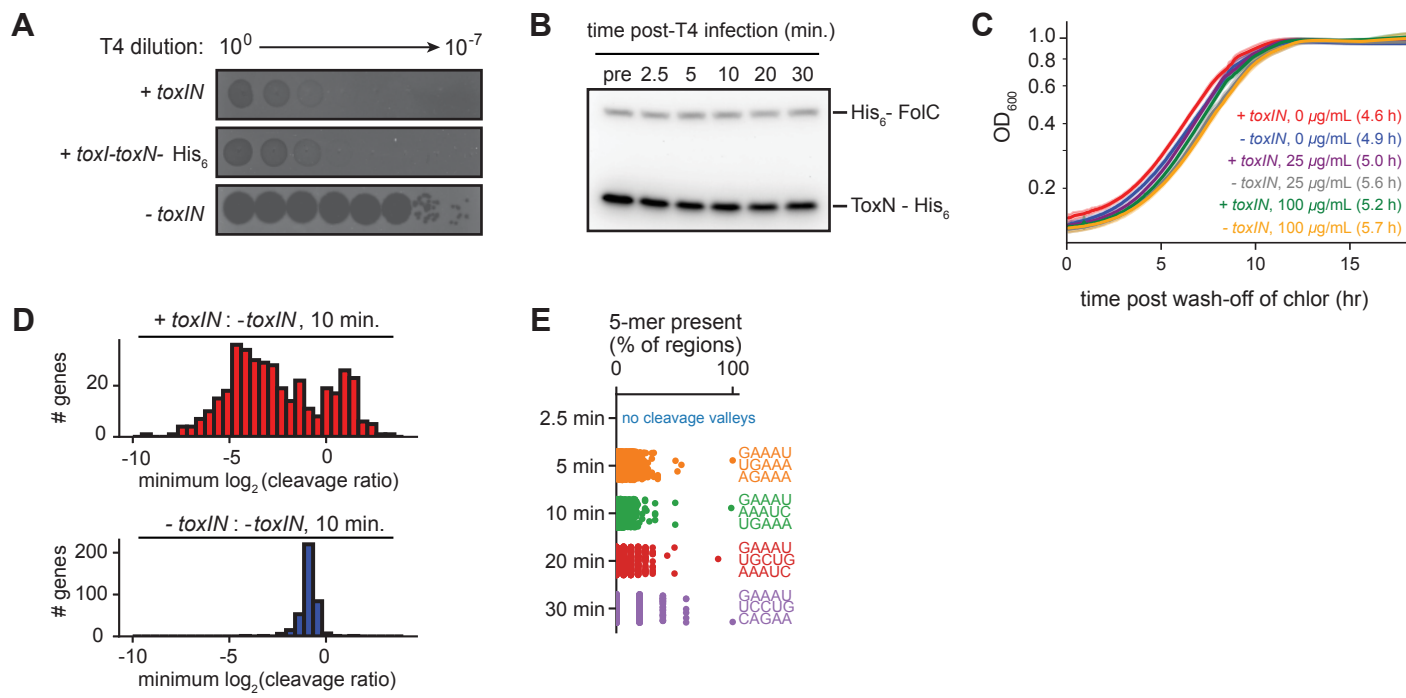

**Fig. S4. ToxN is activated by transcription shutoff of *toxIN*, Related to Fig. 4.**

(A) Serial dilution plaque assays for T4 spotted on *+toxIN*, *+toxI toxN*-His<sub>6</sub>, and *-toxIN* cells.

(B) Western blot of ToxN-His<sub>6</sub> during T4 infection with purified His<sub>6</sub>-FolC included as a loading control during cell harvesting. Also see Fig. 4B.

(C) Growth curves for *+toxIN* and *-toxIN* cells following chloramphenicol treatment at the indicated concentrations for 30 min. Data are the mean of two technical replicates each of three biological replicates, and shaded areas report the S.D. Estimated lag time is reported in parentheses.

(D) Histograms showing the distribution of the minimum cleavage ratios within well-expressed coding regions ( $n = 389$ ) in *E. coli* when comparing *+toxIN* to *-toxIN* cells (red, top) or comparing two independent replicates of *-toxIN* cells (blue, bottom) following rif treatment for 10 min.

(E) Percent of well-cleaved regions in the *E. coli* transcriptome that contain each possible 5-mer at the timepoints indicated following rif treatment. Top three most frequent 5-mers are indicated on the right.

Figure S5

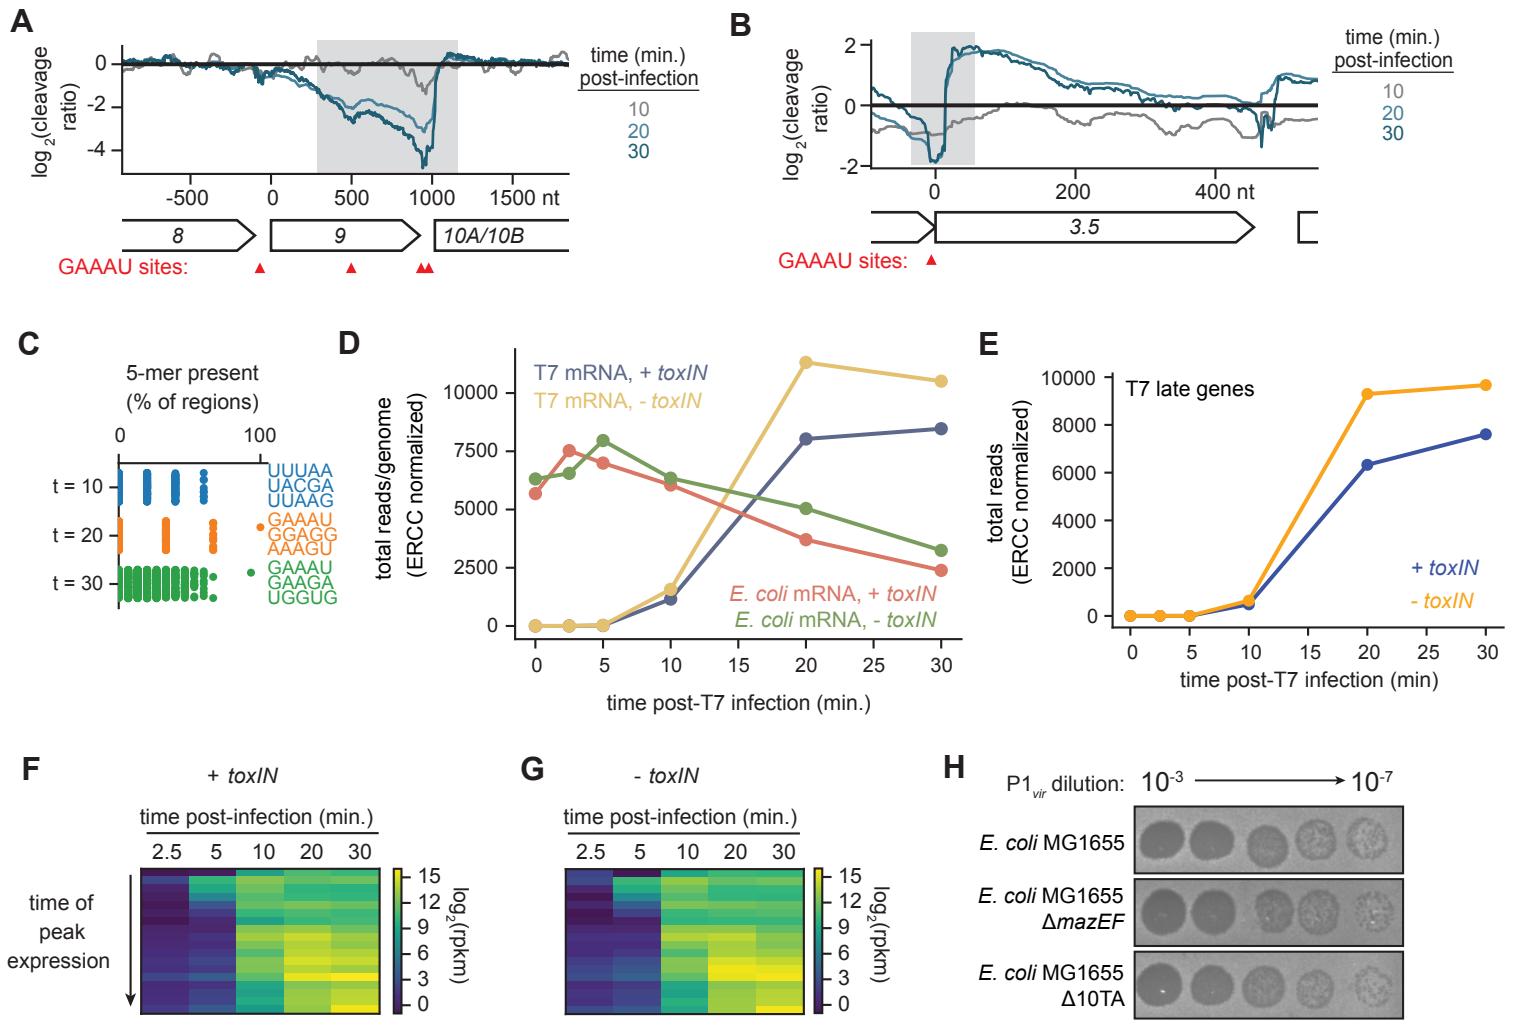

**Fig. S5. ToxN is activated during T7 infection, Related to Fig. 5.**

(A-B) Cleavage profiles for the region surrounding the T7 genes 9 (A) and 3.5 (B) at 10, 20 and 30 min post-infection. Sites of GAAAU motifs are indicated with red triangles.

(C) Scatterplots showing the percent of well-cleaved regions in the T7 transcriptome that contain each possible 5-mer at the times indicated post-infection. Top three most frequent 5-mers are indicated on the right.

(D) Plot showing the total RNA-seq signal coming from host (*E. coli*) and phage (T7) mRNAs relative to the total counts coming from a spike-in control (ERCC standard) at the indicated times post-infection.

(E) Plot showing the total counts coming from T7 late mRNAs relative to the total counts coming from a spike-in control (ERCC standard) at the indicated times post-infection in *+toxIN* and *-toxIN* cells. Late transcripts were defined as those whose time of peak expression (panel G) was 20 or 30 min post-infection.

(F-G) Heatmaps showing the  $\log_2(\text{rpkm})$  (reads per kilobase per million) for each T7 mRNA at each timepoint post-infection in *-toxIN* (F) and *+toxIN* (G) cells. Each row corresponds to an individual mRNA, and mRNAs are ordered based on their time of peak expression in the *-toxIN* dataset. Time of peak expression was determined by comparing the rpkm for a particular transcript relative to the entire T7 transcriptome and determining the timepoint at which a given mRNA made up the largest fraction of the T7 transcriptome.

(H) Serial dilution plaque assays for P1 spotted on *E. coli* MG1655, *E. coli* MG1655  $\Delta\text{mazEF}$ , and *E. coli* MG1655  $\Delta\text{mazEF} \Delta\text{relBE} \Delta\text{chpB} \Delta\text{dinJ-yafQ} \Delta\text{yefM-yoeB} \Delta\text{yafNO} \Delta\text{prlF-yhaV} \Delta\text{hicAB} \Delta\text{ygiMN} \Delta\text{mqsRA}$  ( $\Delta 10\text{TA}$ ).

Figure S6

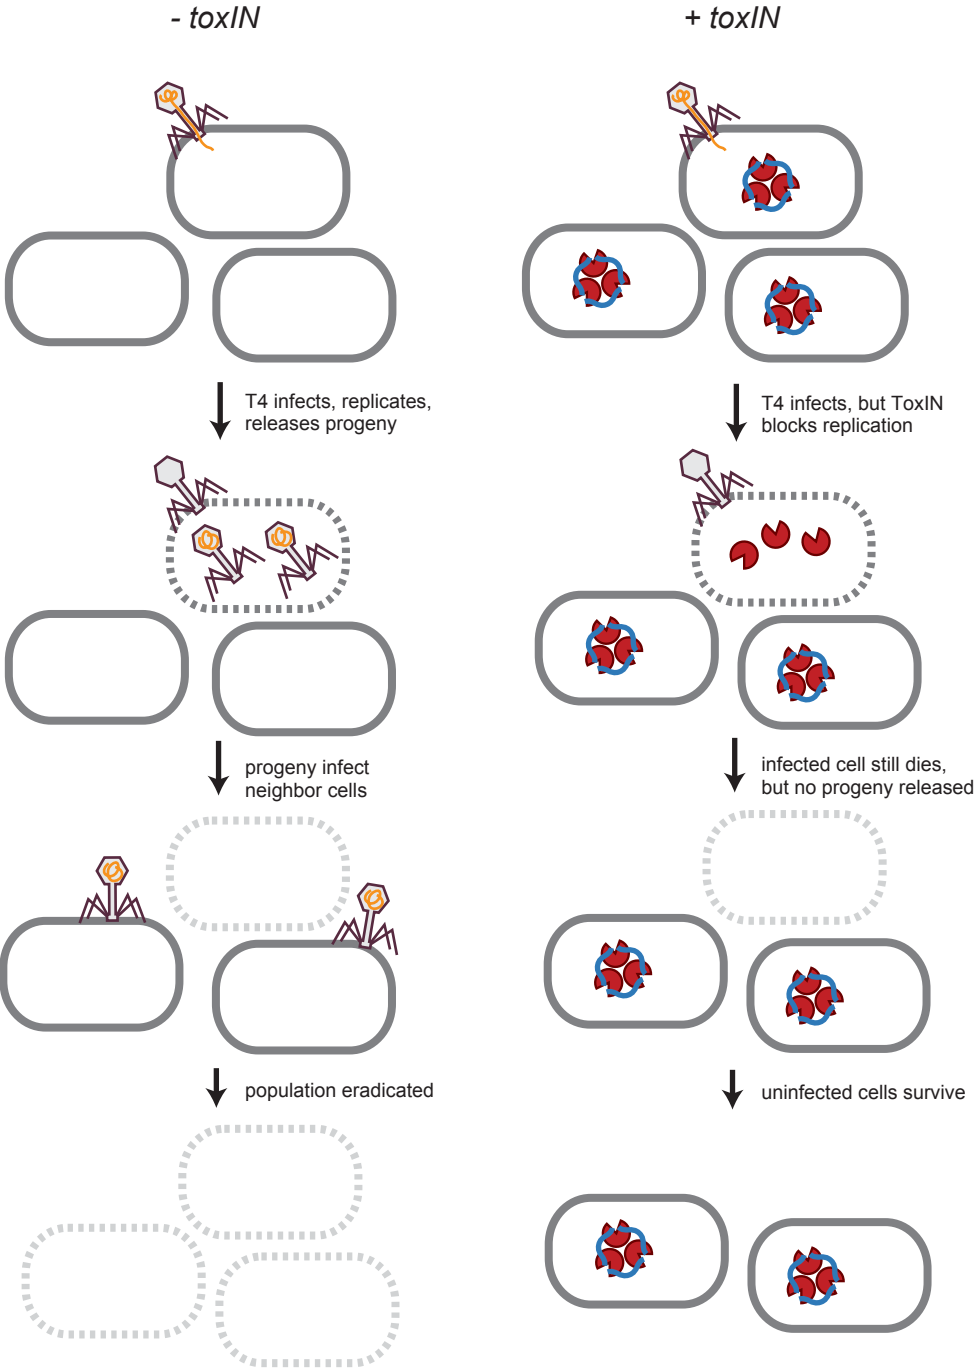

**Fig. S6. Population-level model for phage defense by type III TA systems, Related to Fig. 6.**

(Left) Following infection of a *-toxIN* cell, T4 replicates and releases progeny, which go on to infect neighboring cells and eradicate the cell population. (Right) Following infection of a *+toxIN* cell, ToxN is activated and blocks production of new phage particles. The initially infected cell dies, but because no new progeny are released, uninfected cells in the clonal population survive.

**Table S1. Strains, Related to STAR Methods**

| Name         | Genotype                                                                                                                                              | Source                               |
|--------------|-------------------------------------------------------------------------------------------------------------------------------------------------------|--------------------------------------|
| ML6          | MG1655                                                                                                                                                |                                      |
| DH5 $\alpha$ | Cloning strain                                                                                                                                        | Invitrogen                           |
| ML3358       | MG1655 $\Delta mazEF$                                                                                                                                 | This study                           |
| ML3221       | MG1655                                                                                                                                                | Goeders et al., 2013                 |
| ML3222       | MG1655 $\Delta mazEF \Delta relBE \Delta chpB \Delta dinJ-yafQ \Delta yefM-yoeB \Delta yafNO \Delta prfF-yhaV \Delta hicAB \Delta ygiMN \Delta mqsRA$ | Goeders et al., 2013                 |
| ML3326       | MG1655 pBAD33- <i>toxN</i> pEXT20- <i>toxI</i>                                                                                                        | This study                           |
| ML3327       | MG1655 pBAD33 pEXT20                                                                                                                                  | This study                           |
| ML3328       | MG1655 pBR322- <i>toxIN</i>                                                                                                                           | This study                           |
| ML3329       | MG1655 pBR322- <i>toxI-toxN</i> (K55A)                                                                                                                | This study                           |
| ML3330       | MG1655 pBR322                                                                                                                                         | This study                           |
| ML3331       | MG1655 pBR322- <i>toxI-toxN</i> -His <sub>6</sub>                                                                                                     | This study                           |
| ML3332       | MG1655 pBR322- <i>toxIN</i> pdCas9deg- <i>toxIN</i> gRNA                                                                                              | This study                           |
| ML3333       | MG1655 pBR322- <i>toxI-toxN</i> (K55A) pdCas9deg- <i>toxIN</i> gRNA                                                                                   | This study                           |
| ML3334       | MG1655 pBR322 pdCas9deg- <i>toxIN</i> gRNA                                                                                                            | This study                           |
| ML3335       | MG1655 pACYC- <i>toxIN</i> pBluescript-P <sub>35.3 (T4 early)</sub> - <i>toxI</i>                                                                     | This study                           |
| ML3336       | MG1655 pACYC- <i>toxIN</i> pBluescript-P <sub>rIIB2 (T4 middle)</sub> - <i>toxI</i>                                                                   | This study                           |
| ML3337       | MG1655 pACYC- <i>toxIN</i> pBluescript-P <sub>soc (T4 late)</sub> - <i>toxI</i>                                                                       | This study                           |
| ML3338       | MG1655 pACYC- <i>toxIN</i> pBluescript II SK(+)                                                                                                       | This study                           |
| ML3339       | MG1655 pACYC pBluescript-P <sub>35.3 (T4 early)</sub> - <i>toxI</i>                                                                                   | This study                           |
| ML3340       | MG1655 pACYC pBluescript-P <sub>rIIB2 (T4 middle)</sub> - <i>toxI</i>                                                                                 | This study                           |
| ML3341       | MG1655 pACYC pBluescript-P <sub>soc (T4 late)</sub> - <i>toxI</i>                                                                                     | This study                           |
| ML3342       | MG1655 pACYC pBluescript II SK(+)                                                                                                                     | This study                           |
| ML3343       | DH5 $\alpha$ pBAD33- <i>toxN</i>                                                                                                                      | This study                           |
| ML3344       | DH5 $\alpha$ pBAD33                                                                                                                                   | This study                           |
| ML3345       | DH5 $\alpha$ pEXT20- <i>toxI</i>                                                                                                                      | This study                           |
| ML1978       | DH5 $\alpha$ pEXT20                                                                                                                                   | E. coli Genetic Stock Center, #12325 |
| ML3346       | DH5 $\alpha$ pBR322- <i>toxIN</i>                                                                                                                     | This study                           |
| ML3347       | DH5 $\alpha$ pBR322- <i>toxI-toxN</i> (K55A)                                                                                                          | This study                           |
| ML3348       | DH5 $\alpha$ pBR322                                                                                                                                   | This study                           |
| ML3349       | DH5 $\alpha$ pBR322- <i>toxI-toxN</i> -His <sub>6</sub>                                                                                               | This study                           |
| ML3350       | DH5 $\alpha$ pdCas9deg- <i>toxIN</i> gRNA                                                                                                             | This study                           |
| ML3351       | DH5 $\alpha$ pACYC- <i>toxIN</i>                                                                                                                      | This study                           |
| ML3352       | DH5 $\alpha$ pACYC                                                                                                                                    | This study                           |
| ML3353       | DH5 $\alpha$ pBluescript-P <sub>35.3 (T4 early)</sub> - <i>toxI</i>                                                                                   | This study                           |
| ML3354       | DH5 $\alpha$ pBluescript-P <sub>rIIB2 (T4 middle)</sub> - <i>toxI</i>                                                                                 | This study                           |
| ML3355       | DH5 $\alpha$ pBluescript-P <sub>soc (T4 late)</sub> - <i>toxI</i>                                                                                     | This study                           |
| ML3356       | DH5 $\alpha$ pBluescript II SK(+)                                                                                                                     | This study                           |

**Table S2. Plasmids, Related to STAR Methods**

| Plasmid                                                  | Description                                                                                     | Source                               |
|----------------------------------------------------------|-------------------------------------------------------------------------------------------------|--------------------------------------|
| pBAD33                                                   | Arabinose inducible vector                                                                      | Guzman et al., 1995                  |
| pBAD33- <i>toxN</i>                                      | Arabinose inducible ToxN expression                                                             | This study                           |
| pEXT20                                                   | IPTG inducible vector                                                                           | E. coli Genetic Stock Center, #12325 |
| pEXT20- <i>toxI</i>                                      | IPTG inducible <i>toxI</i> expression                                                           | This study                           |
| pBR322- <i>toxIN</i>                                     | Full <i>toxIN</i> locus                                                                         | This study                           |
| pBR322- <i>toxI-toxN</i> (K55A)                          | <i>toxIN</i> locus with active-site ToxN mutant                                                 | This study                           |
| pBR322- <i>toxI-toxN</i> -His <sub>6</sub>               | <i>toxIN</i> locus with C-terminal His <sub>6</sub> -tagged ToxN                                | This study                           |
| pBR322 empty vector                                      | Derivative of pBR322 with pTet removed                                                          | This study                           |
| pBluescript II SK(+)                                     | Control for P <sub>T4</sub> - <i>toxI</i> experiments                                           | D. Alley                             |
| pBluescript-P <sub>35.3 (T4 early)</sub> - <i>toxI</i>   | Expression of <i>toxI</i> during T4 infection                                                   | This study                           |
| pBluescript-P <sub>rHIB2 (T4 middle)</sub> - <i>toxI</i> | Expression of <i>toxI</i> during T4 infection                                                   | This study                           |
| pBluescript-P <sub>soc (T4 late)</sub> - <i>toxI</i>     | Expression of <i>toxI</i> during T4 infection                                                   | This study                           |
| pACYC empty vector                                       | Derivative of pACYC-Duet with <i>lacI</i> and two multiple cloning sites removed                | This study                           |
| pACYC- <i>toxIN</i>                                      | Full <i>toxIN</i> locus                                                                         | This study                           |
| pdCas9deg- <i>toxIN</i> gRNA                             | aTc-inducible expression of catalytically-inactive Cas9 for repression of <i>toxIN</i> promoter | This study                           |

**Table S3. Primers, Related to STAR Methods.**

| Number | Purpose                                                                            | Sequence (5'→3')                                                                                                                                                                                                             |
|--------|------------------------------------------------------------------------------------|------------------------------------------------------------------------------------------------------------------------------------------------------------------------------------------------------------------------------|
| CG-1   | <i>toxN</i> into pBAD33 (forward)                                                  | ATGCAGAGCTCATGAAATTTTACACAATATCAAGCA<br>GTTACATAAAATACCTG                                                                                                                                                                    |
| CG-2   | <i>toxN</i> into pBAD33 (reverse)                                                  | GCCGTGTCGACTTAATCGTCTATTTCCATGTCTTCAG<br>GTTTTTTACCG                                                                                                                                                                         |
| CG-3   | Ultramer to construct <i>toxI</i> locus with 3.5 tandem repeats (sense strand)     | AGGTGATTTGCTACCTTTAAGTGCAGCTAGAAATTC<br>AGGTGATTTGCTACCTTTAAGTGCAGCTAGAAATTC<br>AGGTGATTTGCTACCTTTAAGTGCAGCTAGAAATTT<br>AGGTCATTTACTACCTTAAAGTAATAAAGTAAAAAA<br>GGCGACTATACACAGTCGCCTTTTTTACGAGAAAAA                         |
| CG-4   | Ultramer to construct <i>toxI</i> locus with 3.5 tandem repeats (antisense strand) | TTTTTCTCGTAAAAAAGGCGACTGTGTATAGTCGCCT<br>TTTTTACTTTATTACTTTAAGGTAGTAAATGACCTAA<br>ATTTCTAGCTGCACCTTAAAGGTAGCAAATCACCTGA<br>ATTTCTAGCTGCACCTTAAAGGTAGCAAATCACCTGA<br>ATTTCTAGCTGCACCTTAAAGGTAGCAAATCACCT                      |
| CG-5   | <i>toxI</i> into pEXT20 (forward)                                                  | AGGAAACAGAATTCGAGCTCAGGTGATTTGCTACCT<br>TTAAG                                                                                                                                                                                |
| CG-6   | <i>toxI</i> into pEXT20 (reverse)                                                  | GCTTGCATGCCTGCAGGTCGACCATTTTTTCTCGTAA<br>AAAAGGCGACTGTG                                                                                                                                                                      |
| CG-7   | Ultramer to construct full <i>toxI</i> locus using overlap PCR (sense strand)      | GCTACCTTTAAGTGCAGCTAGAAATTTAGGTGATTT<br>GCTACCTTTAAGTGCAGCTAGAAATTTAGGTGATTT<br>GCTACCTTTAAGTGCAGCTAGAAATTCAGGTGATTT<br>GCTACCTTTAAGTGCAGCTAGAAATTCAGGTGATTT<br>GCTACCTTTAAGTGCAGCTAGAAATTTAGGTCATTTA<br>CTACCTTAAAGTAATAAAG |
| CG-8   | Construct full <i>toxI</i> locus (forward, PCR1)                                   | CATGTATACTTAGTTCAAGGTGATTTGCTACCTTAA<br>GTGCAGCTAGAAATTT                                                                                                                                                                     |
| CG-9   | Construct full <i>toxI</i> locus (reverse forward, PCR1,2&3)                       | TGTAACCTGCTTGATATTGTGTAAAATTTTCAATTTTTTC<br>TCGTAAAAAAGGCGACTGTG                                                                                                                                                             |
| CG-10  | Construct full <i>toxI</i> locus (forward, PCR2)                                   | GTAAGCCCAAGCGAAGATCATGTATACTTAGTTCAA<br>GGTGATTTGC                                                                                                                                                                           |
| CG-11  | Construct full <i>toxI</i> locus (forward, PCR3)                                   | CTGAACATCCCATGCTAAGCACCTAGTTGTAAGCCC<br>AAGCGAAGATCATG                                                                                                                                                                       |
| CG-12  | Amplify full <i>toxIN</i> locus (forward)                                          | TTTATCACAGTTAAATTGCTAACGCAGTCAG                                                                                                                                                                                              |
| CG-13  | Amplify full <i>toxIN</i> locus (reverse)                                          | GGAGTGGTGAATCCGTTAGCG                                                                                                                                                                                                        |
| CG-14  | Construct pBR322 empty vector and assemble pBR322- <i>toxIN</i> (forward)          | ATGGAAGCCGCGGCAC                                                                                                                                                                                                             |
| CG-15  | Construct pBR322 empty vector and assemble pBR322- <i>toxIN</i> (reverse)          | ACATGAGAATTCTTGAAGACGAAAGGGC                                                                                                                                                                                                 |
| CG-16  | Construct pBR322- <i>toxI-toxN</i> (K55A) (forward)                                | GCGGCATGGCATGCTAATGTAAAAGAGTCATC                                                                                                                                                                                             |
| CG-17  | Construct pBR322- <i>toxI-toxN</i> (K55A) (reverse)                                | TGGCGATGTTAAAGGTGCTAAATATTTATGTCC                                                                                                                                                                                            |
| CG-18  | Construct pBR322- <i>toxI-toxN</i> -His <sub>6</sub> (forward)                     | CATCATCACCATCACCATTAACCATTCTTTTTTATGG<br>AATTGAAGGTCCAAAATC                                                                                                                                                                  |
| CG-19  | Construct pBR322- <i>toxI-toxN</i> -His <sub>6</sub> (reverse)                     | GCTTCCGCTTCCATCGTCTATTTTC                                                                                                                                                                                                    |
| CG-20  | Construct pACYC- <i>toxIN</i> (forward)                                            | GTGAGCTAACTTACATTAATTGCGTTGCGCCTGAAC<br>ATCCCATGCTAAGCACC                                                                                                                                                                    |
| CG-21  | Construct pACYC- <i>toxIN</i> (reverse)                                            | TCTCAAATGCCTGAGGTTTCAGCTTATATTGGATGAG<br>AGCAAAAAAATAGGTCCAAAAC                                                                                                                                                              |
| CG-22  | Construct pACYC empty vector and assemble pACYC- <i>toxIN</i> (forward)            | CTGAAACCTCAGGCATTTGAGAAGCAC                                                                                                                                                                                                  |

|       |                                                                                                                |                                                                               |
|-------|----------------------------------------------------------------------------------------------------------------|-------------------------------------------------------------------------------|
| CG-23 | Construct pACYC empty vector and assemble pACYC- <i>toxIN</i> (reverse)                                        | GCGCAACGCAATTAATGTAAGTTAGCTCAC                                                |
| CG-22 | Amplify T4 35.3 promoter (forward)                                                                             | TAGAGGATCTGCTCATGTTTGACAGCTTATCCCTGGC<br>ATCGTAGAATTCATTATCC                  |
| CG-23 | Amplify T4 35.3 promoter (reverse)                                                                             | ATGATCTCCGACTAGTACATATGAATCAAGTTTCAG<br>TTACTATAACACGTAAGTATGATAGATTTGTAAAATC |
| CG-24 | Amplify T4 <i>rIIB2</i> promoter (forward)                                                                     | TAGAGGATCTGCTCATGTTTGACAGCTTATCTCATGA<br>CATTTGGACAGTAACTAATCTTTTTG           |
| CG-25 | Amplify T4 <i>rIIB2</i> promoter (reverse)                                                                     | ATGATCTCCGACTAGTACATATGAATCAAGTTAGCA<br>ACCATTTTATCACTGTTTTTTGAAGC            |
| CG-26 | Amplify T4 <i>soc</i> promoter (forward)                                                                       | TAGAGGATCTGCTCATGTTTGACAGCTTATCCTTAAG<br>AATTTAATTTACTTATTCAGAAAAGAAGATG      |
| CG-27 | Amplify T4 <i>soc</i> promoter (reverse)                                                                       | ATGATCTCCGACTAGTACATATGAATCAAGTTATGA<br>TTATTTATACATCTTCTTTTCTGAATAAG         |
| CG-28 | Amplify pKVS45 backbone to assemble pKVS45- <i>P<sub>T4</sub></i> (forward)                                    | ATGCCCCGTCGACAGGGAAGTCCAGGCATCAAATA                                           |
| CG-29 | Amplify pKVS45 backbone to assemble pKVS45- <i>P<sub>T4</sub></i> (reverse)                                    | GATAAGCTGTCAAACATGAGCAGATCCTCTACG                                             |
| CG-30 | Amplify <i>toxIN</i> for Gibson assembly into pKVS45- <i>P<sub>T4</sub></i> (forward)                          | TTTATTTGATGCCTGGCAGTTCCTCTTATATTGGAT<br>GAGAGCAAAAAAATAGGTCC                  |
| CG-31 | Amplify <i>toxIN</i> for Gibson assembly into pKVS45- <i>P<sub>T4</sub></i> (reverse)                          | ATTTGATGCCTGGCAGTTCCTCATTTTTTCTCGTAA<br>AAAAGGCGACTGTGTATAG                   |
| CG-32 | Amplify pKVS45- <i>P<sub>T4</sub></i> for Gibson assembly with <i>toxIN</i> (forward)                          | ATACATGATGTCGGACAAGTGGTCTTAGATGATC<br>TCCGACTAGTACATATGAATCAAG                |
| CG-33 | Amplify pKVS45- <i>P<sub>T4</sub></i> for Gibson assembly with <i>toxIN</i> (reverse)                          | AGGGAACTGCCAGGCATCAAATA                                                       |
| CG-34 | Remove region upstream of <i>toxIN</i> in pKVS45- <i>P<sub>35.3-toxIN</sub></i> (forward)                      | TCAGTTACTATAACACGTAAGTATGATAGATTTGTAAAA<br>TCTTTATAG                          |
| CG-35 | Remove region upstream of <i>toxIN</i> in pKVS45- <i>P<sub>rIIB2-toxIN</sub></i> (forward)                     | AGCAACCATTTTATCACTGTTTTTTGAAGC                                                |
| CG-36 | Remove region upstream of <i>toxIN</i> in pKVS45- <i>P<sub>soc-toxIN</sub></i> (forward)                       | ATGATTATTTATACATCTTCTTTTCTGAATAAGTAAA<br>TTAAATTC                             |
| CG-37 | Remove region upstream of <i>toxIN</i> in pKVS45- <i>P<sub>T4-toxIN</sub></i> (reverse)                        | AAGGTGATTTGCTACCTTTAAGTGCAGCTAGAAATT<br>T                                     |
| CG-38 | Amplify <i>P<sub>35.3-toxI</sub></i> for construction of pBluescript- <i>P<sub>35.3-toxI</sub></i> (forward)   | TAGAACTAGTGGATCCCCGGGCTGCAGGACCTGGC<br>ATCGTAGAATTCATTATCC                    |
| CG-39 | Amplify <i>P<sub>T4-toxI</sub></i> for construction of pBluescript- <i>P<sub>T4-toxI</sub></i> (reverse)       | CCTCGAGGTCGACGGTATCGATTTACATTTTTTCTCG<br>TAAAAAAGGCGACTGTG                    |
| CG-40 | Amplify <i>P<sub>rIIB2-toxI</sub></i> for construction of pBluescript- <i>P<sub>rIIB2-toxI</sub></i> (forward) | TAGAACTAGTGGATCCCCGGGCTGCAGGATCATGA<br>CATTTGGACAGTAACTAATCTTTTTG             |
| CG-41 | Amplify <i>P<sub>soc-toxI</sub></i> for construction of pBluescript- <i>P<sub>soc-toxI</sub></i> (forward)     | CTAGAACTAGTGGATCCCCGGGCTGCAGGACTTAA<br>GAATTTAATTTACTTATTCAGAAAAGAAGATG       |
| CG-42 | Linearize pBluescript II SK(+) for construction of pBluescript- <i>P<sub>T4-toxI</sub></i> (forward)           | TCCTGCAGCCCCGGGGGATC                                                          |
| CG-43 | Linearize pBluescript II SK(+) for construction of pBluescript- <i>P<sub>T4-toxI</sub></i> (reverse)           | TAAATCGATACCGTCGACCTCGAGG                                                     |
| CG-44 | Construct pdCas9deg- <i>toxIN</i> gRNA (forward)                                                               | CCACTAGTTTACAAGTGGTGTAGCAGTTTTAGA<br>GCTAGAAATAGCAAG                          |

|       |                                                  |                                |
|-------|--------------------------------------------------|--------------------------------|
| CG-45 | Construct pdCas9deg- <i>toxIN</i> gRNA (reverse) | GGACTAGTATTATACCTAGGACTGAG     |
| CG-46 | Northern blot probe for <i>toxI</i>              | CTAGCTGCACTTAAAGGTAGCAAATCACCT |
| CG-47 | Northern blot probe for <i>groL</i>              | GTCGTTAGCGGCTTTAGTAATCTGGATACC |
